# Supplementary material for: Mechanoresponsive Material of AIE-Active 1,4-Dihydropyrrolo[3,2-b]pyrrole Luminophores Bearing Tetraphenylethylene Group with Rewritable Data Storage
Source: PubMed Central journal article supplement (PMC6321101; doi:10.3390/molecules23123255), 2018-12-10
Supplement: molecules-23-03255-s001.pdf [file molecules-23-03255-s001.pdf]

**Mechanoresponsive material of AIE-active 1,4-dihydropyrrolo[3,2-*b*]pyrrole  
luminophores bearing tetraphenylethylene group with rewritable data  
storage**

Yuqing Ma, Yuyang Zhang, Lin Kong, Jiexiang Yang\*

*<sup>a</sup>College of Chemistry & Chemical Engineering, Anhui University, Anhui Province*

*Key Laboratory of chemistry for Inorganic/Organic Hybrid Functional Materials,*

*Hefei 230601, P. R. China.*

*\*Corresponding authors. Tel: +86-0551-63861279; E-mail address:*

*jxyang@ahu.edu.cn*

**SUPPLEMENTARY DATA**

**Contents**

1. Figure S1. <sup>1</sup>H NMR spectrum of **APPCN**
2. Figure S2. MALDI-TOF spectrum of **APPCN**
3. Figure S3. <sup>1</sup>H NMR spectrum of **APPTPECN**
4. Figure S4. <sup>13</sup>C NMR spectrum of **APPTPECN**
5. Figure S5. MALDI-TOF spectrum of **APPTPECN**
6. Figure S6. DLS plot of **APPTPECN**
7. Figure S7. Fluorescence decay curves for solid-state of **APPTPECN** before and after grinding

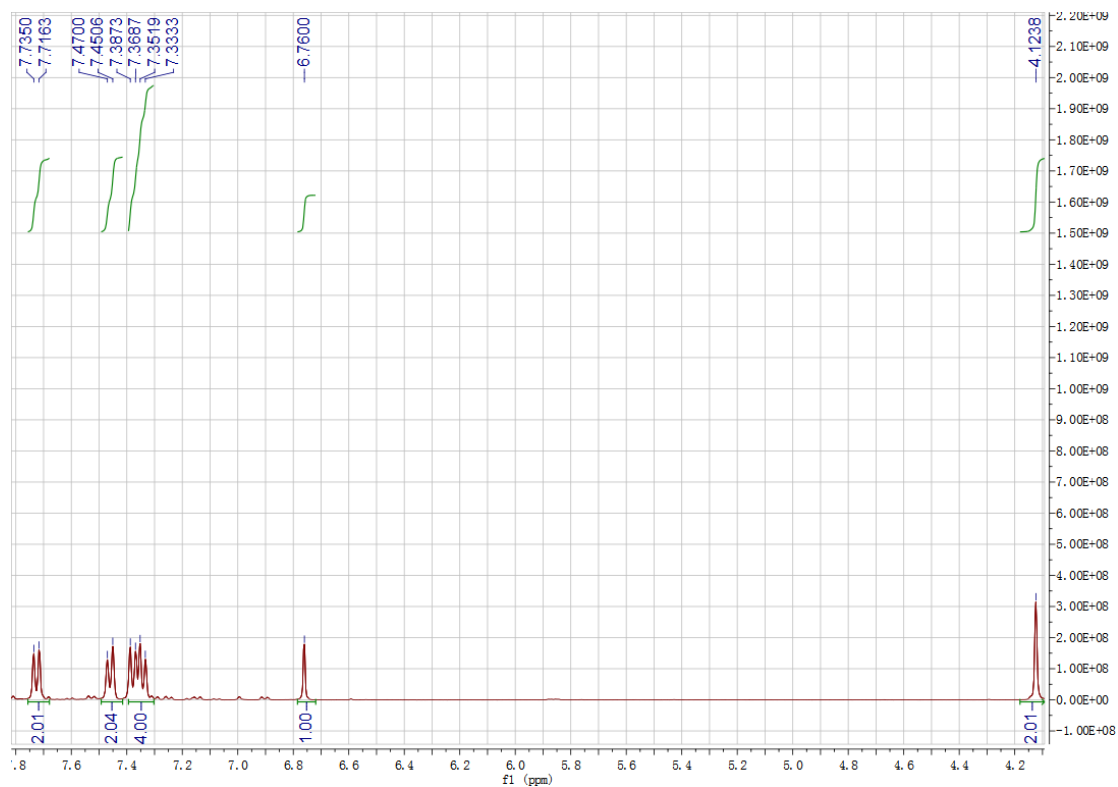

**Figure S1.** <sup>1</sup>H NMR spectrum of APCN

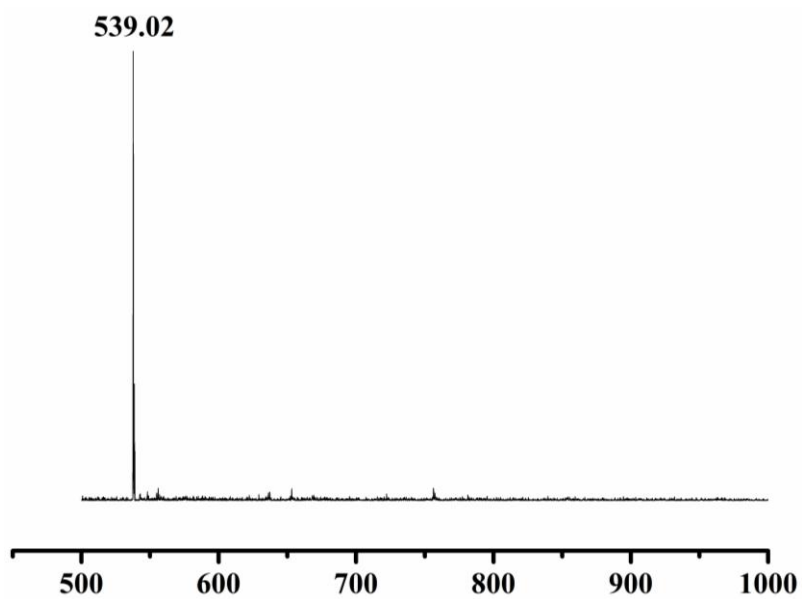

**Figure S2.** MALDI-TOF spectrum of APCN

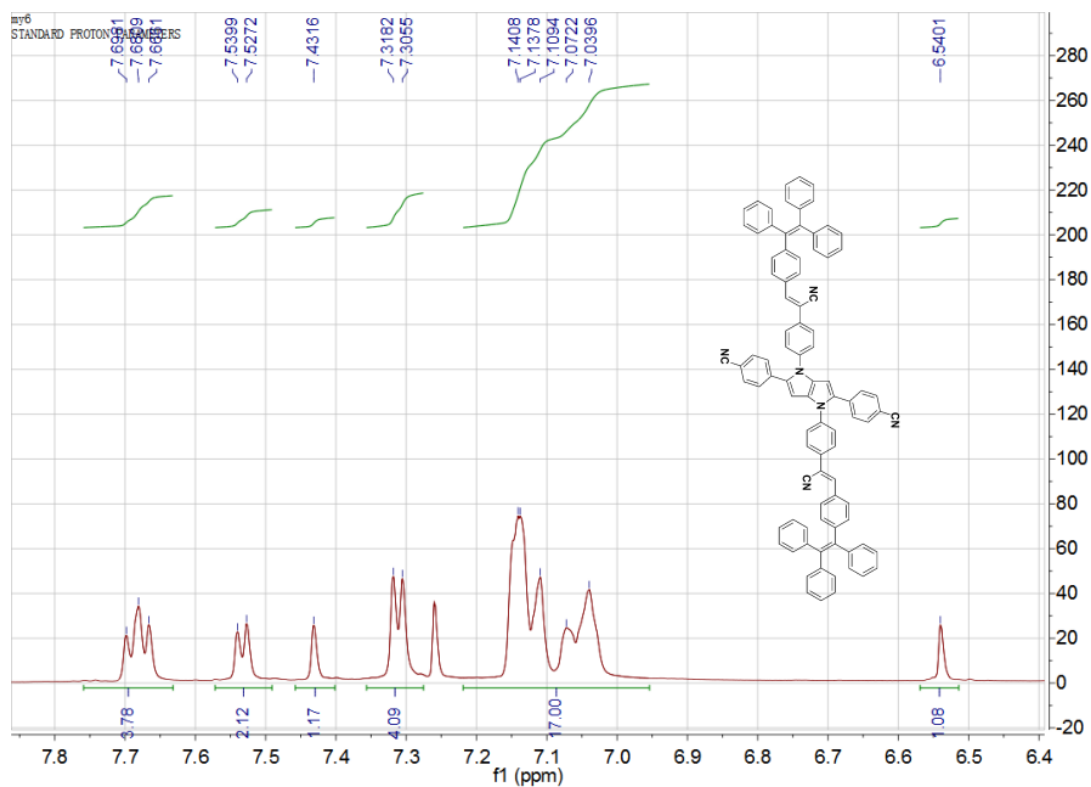

Figure S3.  $^1\text{H}$  NMR spectrum of APPTPECN

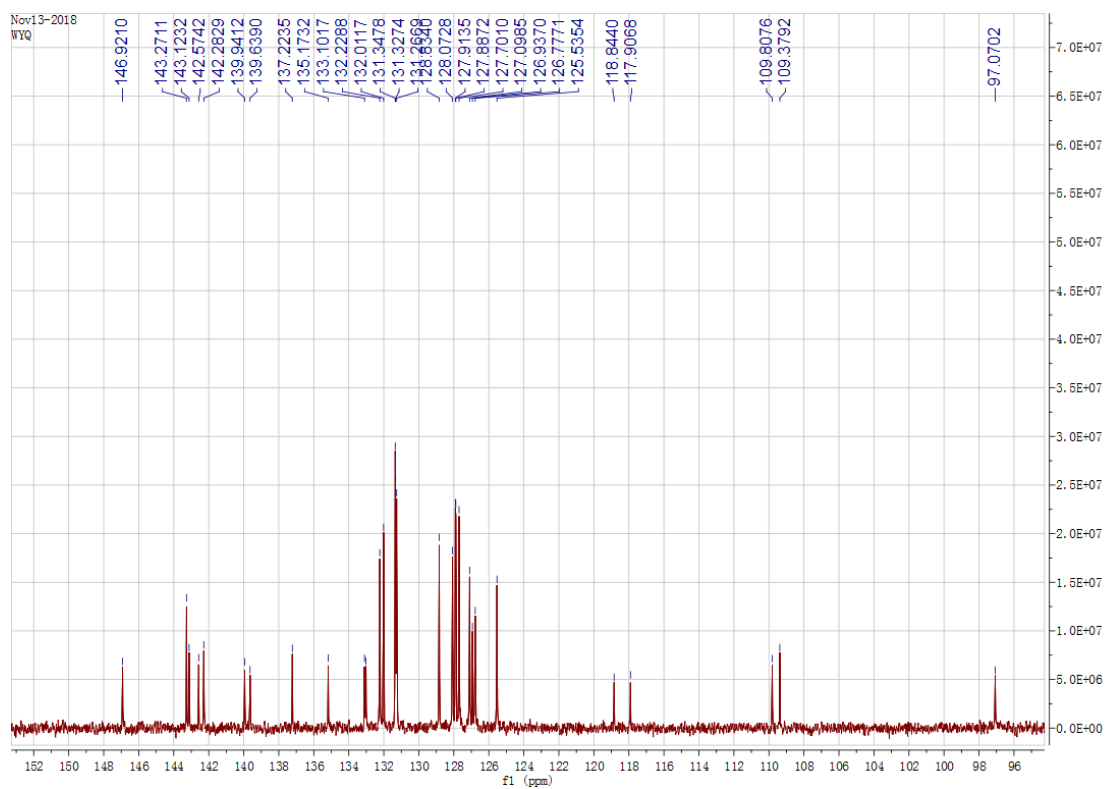

Figure S4.  $^{13}\text{C}$  NMR spectrum of APPTPECN

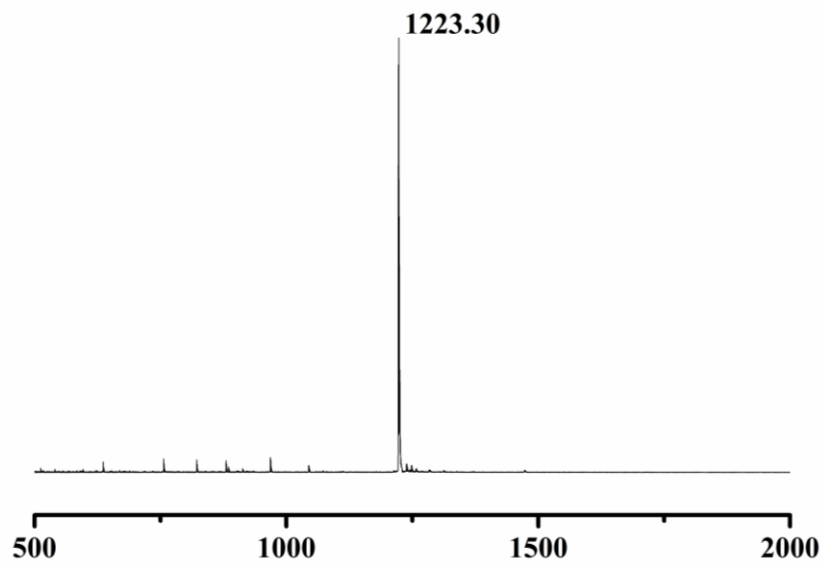

Figure S5. MALDI-TOF spectrum of APPTPECN

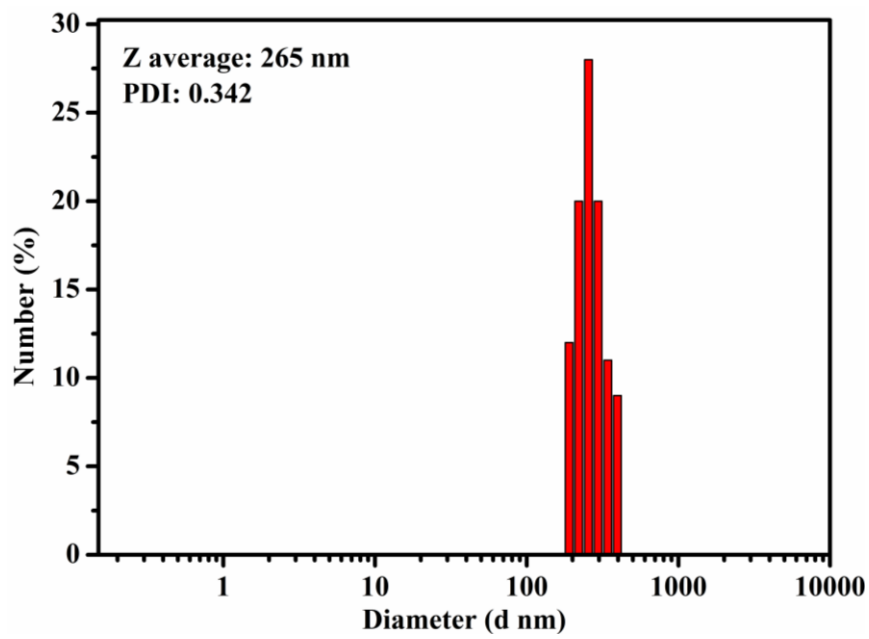

Figure S6. DLS plot of APPTPECN

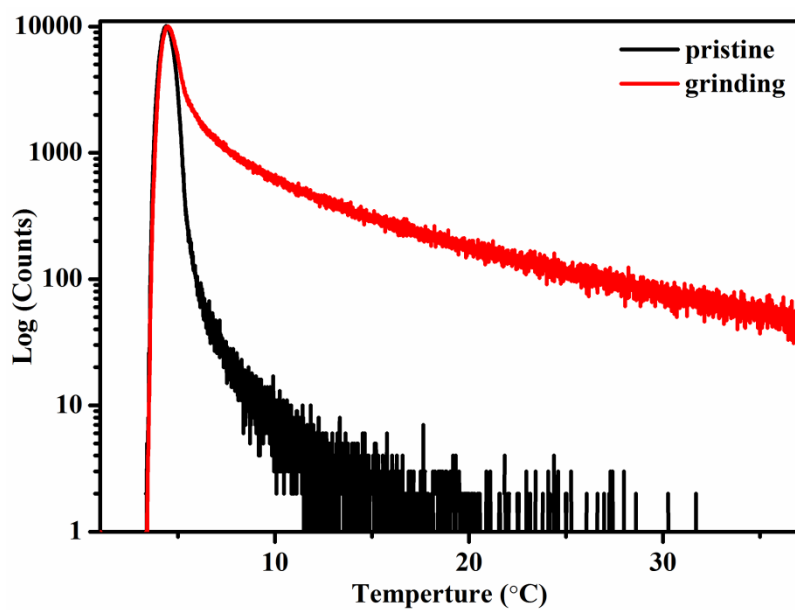

**Figure S7.** Fluorescence decay curves for solid-state of APPTPECN before and after grinding
